# Supplementary material
Source: PubMed Central journal article supplement (PMC7097413)
Supplement: 41577_2013_BFnri3341_MOESM1_ESM.pdf [file 41577_2013_BFnri3341_MOESM1_ESM.pdf]

Supplementary information S1 | Disorders associated with eosinophilia and/or eosinophil accumulation in organs and tissues

| Category                          | Disorder                                       | Description / Comments                                                                                                                                                                 |
|-----------------------------------|------------------------------------------------|----------------------------------------------------------------------------------------------------------------------------------------------------------------------------------------|
| Respiratory                       | Allergic bronchopulmonary aspergillosis (ABPA) | Hypersensitivity to aspergillus observed in patients with pre-existing asthma                                                                                                          |
|                                   | Allergic rhinitis                              | Allergic inflammation of the nasal passages; commonly known as “hay fever”                                                                                                             |
|                                   | Asthma                                         | Chronic inflammatory disease of the airways; may be allergic or non-allergic                                                                                                           |
|                                   | Chronic rhinosinusitis                         | Inflammation of the membrane lining the paranasal sinuses; lasting more than 12 weeks                                                                                                  |
|                                   | Eosinophilic bronchitis                        | Eosinophils in the airway associated with chronic cough; unlike asthma, no airway hyperresponsiveness                                                                                  |
|                                   | Eosinophilic pneumonia                         | Loeffler’s syndrome; eosinophils in the alveoli from any known or unknown cause                                                                                                        |
|                                   | Nasal polyposis                                | Eosinophilic inflammation of the mucosae of the nasal and paranasal sinuses typically associated with rhinitis and asthma                                                              |
| Gastrointestinal                  | Eosinophilic gastroenteritis                   | Rare condition; patchy or diffuse eosinophilic infiltration of gastrointestinal tissue associated with non-specific symptomatology                                                     |
|                                   | Eosinophilic esophagitis                       | Allergic inflammatory disorder of the esophagus; eotaxin-3 is prominent biomarker                                                                                                      |
|                                   | Inflammatory bowel disease                     | Complex heterogeneous inflammatory disorders with impact on small intestine and colon                                                                                                  |
| Dermatologic                      | Atopic dermatitis                              | Non-contagious, chronic pruritic skin disorder                                                                                                                                         |
|                                   | Bullous pemphigoid                             | Autoimmune skin disorder                                                                                                                                                               |
|                                   | Eosinophilic cellulitis                        | Wells’ syndrome; recurrent granulomatous skin disease with eosinophilia                                                                                                                |
|                                   | Eosinophilic folliculitis                      | Ofuji disease; papules associated with hair follicles, seen most commonly in association with HIV disease                                                                              |
| Hypereosinophilic syndromes (HES) | Myeloproliferative HES                         | Chronic eosinophil leukemia; frequently associated with FIP1L1/PDGFRA and other gene fusions                                                                                           |
|                                   | Lymphocytic variant HES                        | Results from aberrantly activated CD3 <sup>+</sup> CD4 <sup>+</sup> T lymphocyte clone                                                                                                 |
|                                   | Gleich’s syndrome                              | Episodic angioedema associated with eosinophilia                                                                                                                                       |
|                                   | NERDS syndrome                                 | Nodules–eosinophilia–rheumatism–dermatitis–swelling syndrome; some features similar to HES                                                                                             |
| Vascular                          | Kawasaki’s disease                             | Arteritis associated with eosinophilia                                                                                                                                                 |
|                                   | Churg–Strauss syndrome                         | Autoimmune vasculitis associated with eosinophilia and granulomata                                                                                                                     |
| Infection                         | Helminth                                       | Eosinophils recruited by Th2 cytokines elicited in response to helminth infection                                                                                                      |
|                                   | Fungus                                         | Notable eosinophilia in response to <i>Coccidioidomycosis</i>                                                                                                                          |
|                                   | Virus                                          | Respiratory Syncytial virus (RSV) in infants, HIV at end stages in association with low CD4 <sup>+</sup> T cells                                                                       |
| Immunologic / neoplastic          | Omenn syndrome                                 | Autosomal recessive severe combined immunodeficiency; autoreactive T cells                                                                                                             |
|                                   | Kimura’s disease                               | Inflammation of the skin, cervical lymph nodes, and salivary glands                                                                                                                    |
|                                   | Hodgkin’s lymphoma                             | Lymphoma; can include prominent eosinophilia in primary lymph node lesions                                                                                                             |
| Muscular / connective tissue      | Eosinophilic fasciitis                         | Shulman’s syndrome; eosinophilic inflammation of the fascia and skin, typically of arms and legs                                                                                       |
|                                   | Inflammatory myopathic syndromes               | Eosinophilic inflammation of muscle tissue; related to trauma, helminth, or idiopathic                                                                                                 |
|                                   | Eosinophil–myalgia syndrome                    | Muscle pain, eosinophilic inflammation correlated to ingestion of L-tryptophan                                                                                                         |
|                                   | Toxic oil syndrome                             | Pulmonary pathology and myalgias associated with ingestion of a tainted commercial rapeseed oil product                                                                                |
|                                   | Calpain-3 mutations                            | Mutations in the gene encoding calpain-3 lead to muscle tissue dysfunction and eosinophilia                                                                                            |
| Ocular                            | Allergic conjunctivitis                        | Atopic keratoconjunctivitis, a severe form of this disorder, can cause blindness                                                                                                       |
| Iatrogenic                        | Cytokine infusion therapy                      | Examples include interleukin-2 (melanoma and renal cancer) and GM-CSF (myeloid reconstitution after transplant)                                                                        |
|                                   | Drug-reaction                                  | DRESS syndrome; Drug Reaction/ Rash with Eosinophilia and Systemic Symptoms; also characterized by long latency after receiving etiologic agent; associated with significant mortality |
|                                   | Graft-vs.-host disease (GvHD)                  | Complication of allogeneic transplant; transplanted cells attack host tissue                                                                                                           |
|                                   | Vaccine hypersensitivity reaction              | Pulmonary eosinophilia observed in response to formalin-fixed RSV antigen vaccine                                                                                                      |
